# Supplementary material for: New fused tetracyclic ring systems: synthesis of 1-thia-4a,11,12-triazatetracenes via a multicomponent strategy, 2D-HMBC structural confirmation, and antimicrobial activity
Source: Royal Society of Chemistry journal article supplement (doi:10.1039/d6ra03008d), 2026-05-18
Supplement: d6ra03008d1.pdf [file d6ra03008d1.pdf]

## Supporting Information

### **Novel Tetracyclic 1-Thia-4a,11,12-triazatetracenes: Synthesis, 2D-HMBC Structural Confirmation, and Antimicrobial Activity**

Reham E Abdelwahab,<sup>1</sup> Mostafa E. Salem,<sup>2</sup> Mohammed Rashed Alsulami,<sup>1</sup> Mona M. Soliman,<sup>3</sup> Ismail A. Abdelhamid,<sup>1\*</sup> Amr Mohamed Abdelmoniem,<sup>1</sup> Faisal K. Algethami,<sup>2</sup> and Ahmed H. M. Elwahy,<sup>1\*</sup>

<sup>1</sup>*Department of Chemistry, Faculty of Science, Cairo University, P.O. 12613 Giza, A.R. Egypt.*

<sup>2</sup>*Chemistry Department, College of Science, Imam Mohammad Ibn Saud Islamic University (IMSIU), P.O. Box, 90905, Riyadh 11623, Saudi Arabia*

<sup>3</sup>*Department of Botany and Microbiology, Faculty of Science, Cairo University, Giza 12613, Egypt*

Email: [ismail\\_shafy@cu.edu.eg](mailto:ismail_shafy@cu.edu.eg); [aelwhy@cu.edu.eg](mailto:aelwhy@cu.edu.eg)

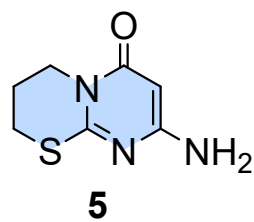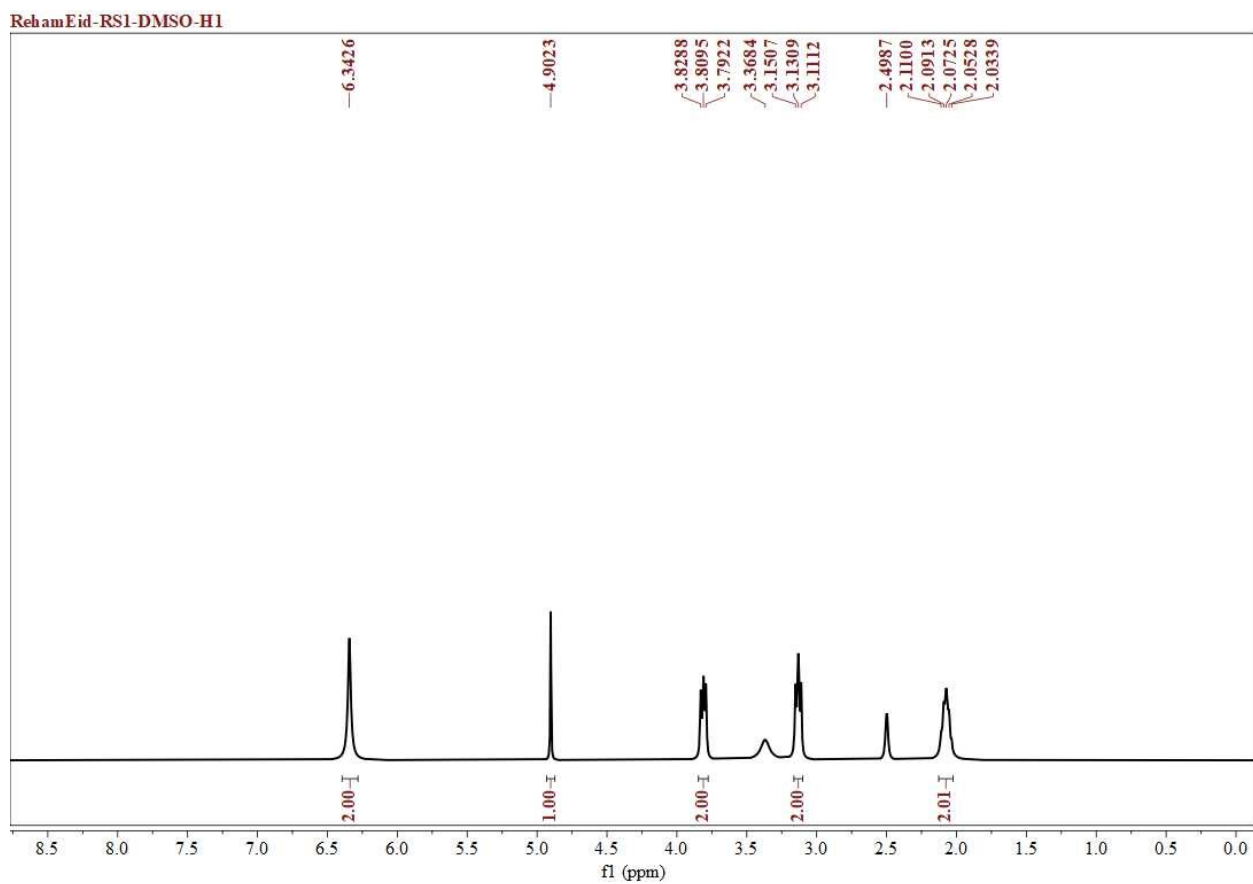

**Figure S1.**  $^1\text{H}$  NMR spectrum of compound **5**

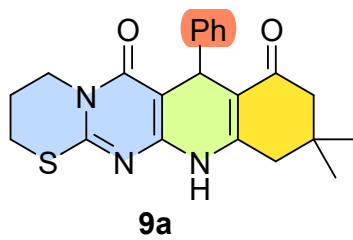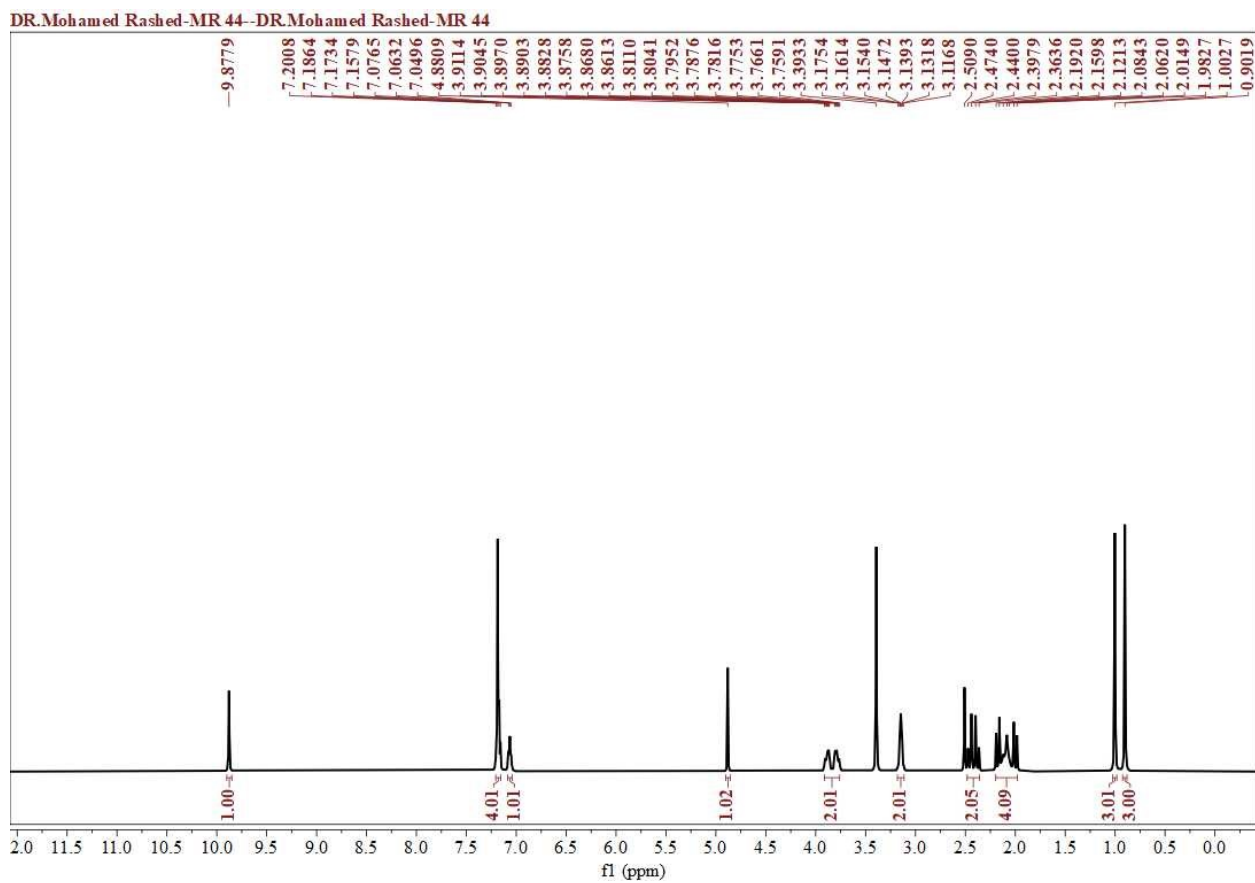

**Figure S2.**  $^1\text{H}$  NMR spectrum of compound **9a**

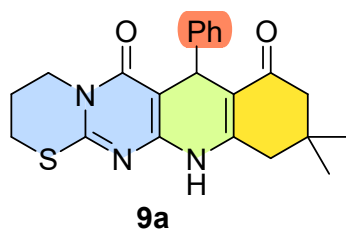

Dr.Mohamed-MR-44 C13--Dr.Mohamed-MR-44 C13

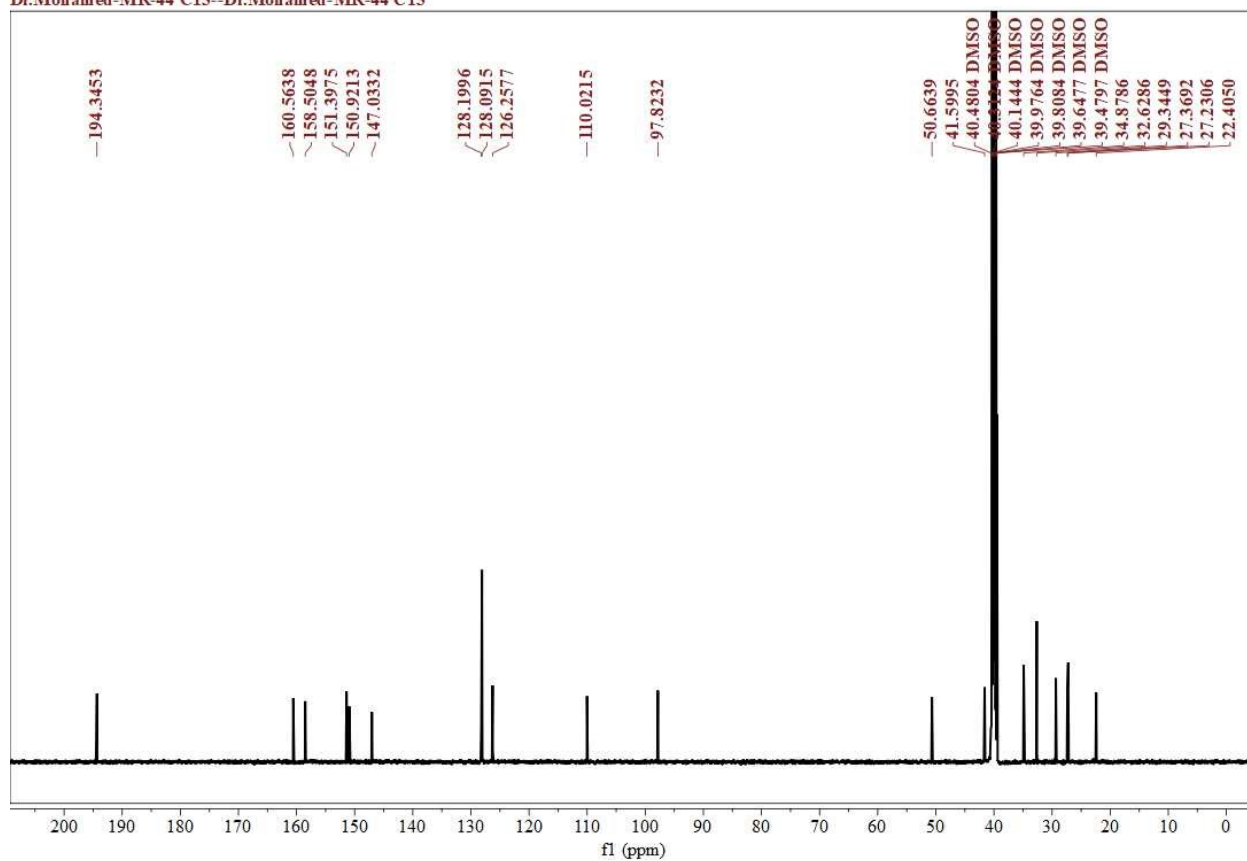

**Figure S3.**  $^{13}\text{C}$  NMR spectrum of compound **9a**

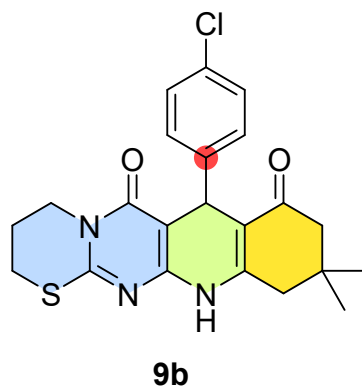

Dr.MohamedRashed-MR42-Dr.MohamedRashed-MR42

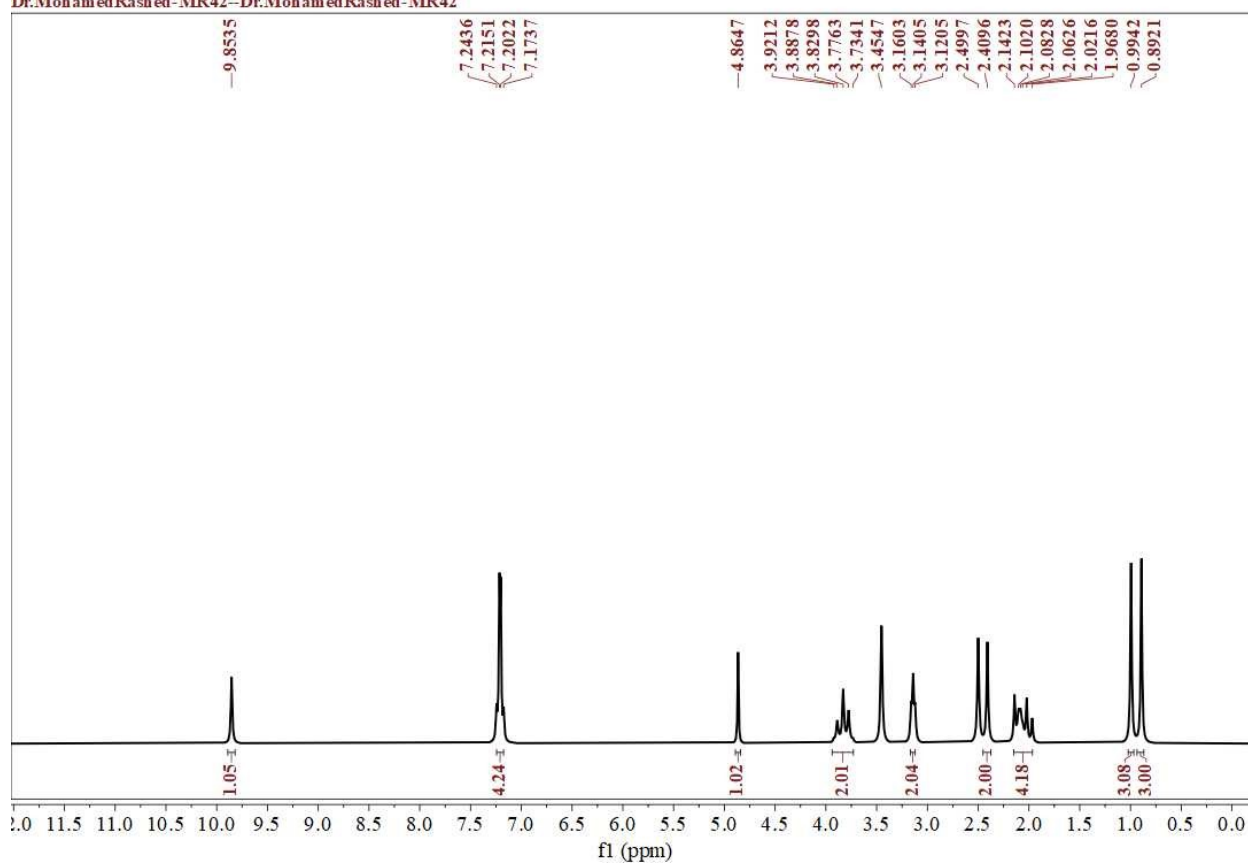

**Figure S4.** <sup>1</sup>H NMR spectrum of compound **9b**

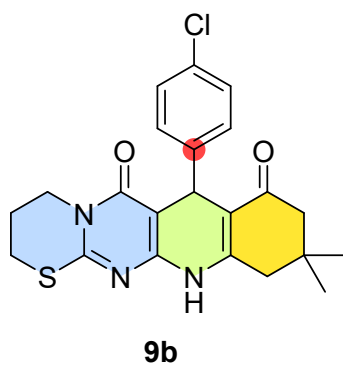

Dr.MohamedRashed-MR-42.C13-Dr.MohamedRashed-MR-42.C13

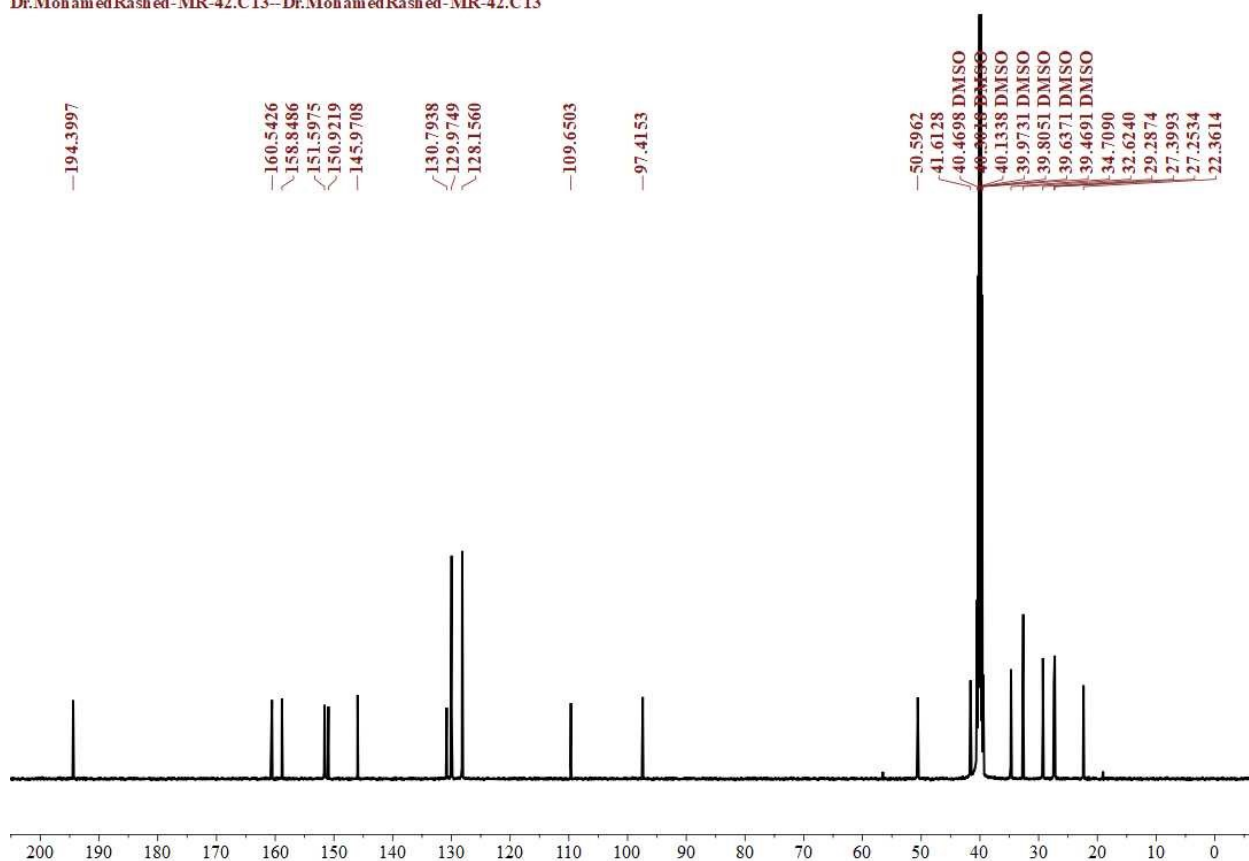

**Figure S5.**  $^{13}\text{C}$  NMR spectrum of compound **9b**

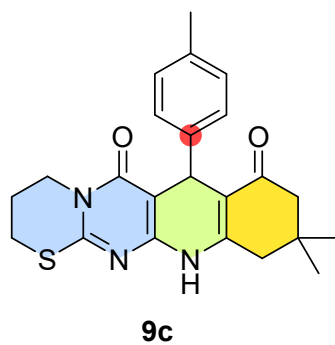

DR.Mohamed Rashed-MR38-DR.Mohamed Rashed-MR38

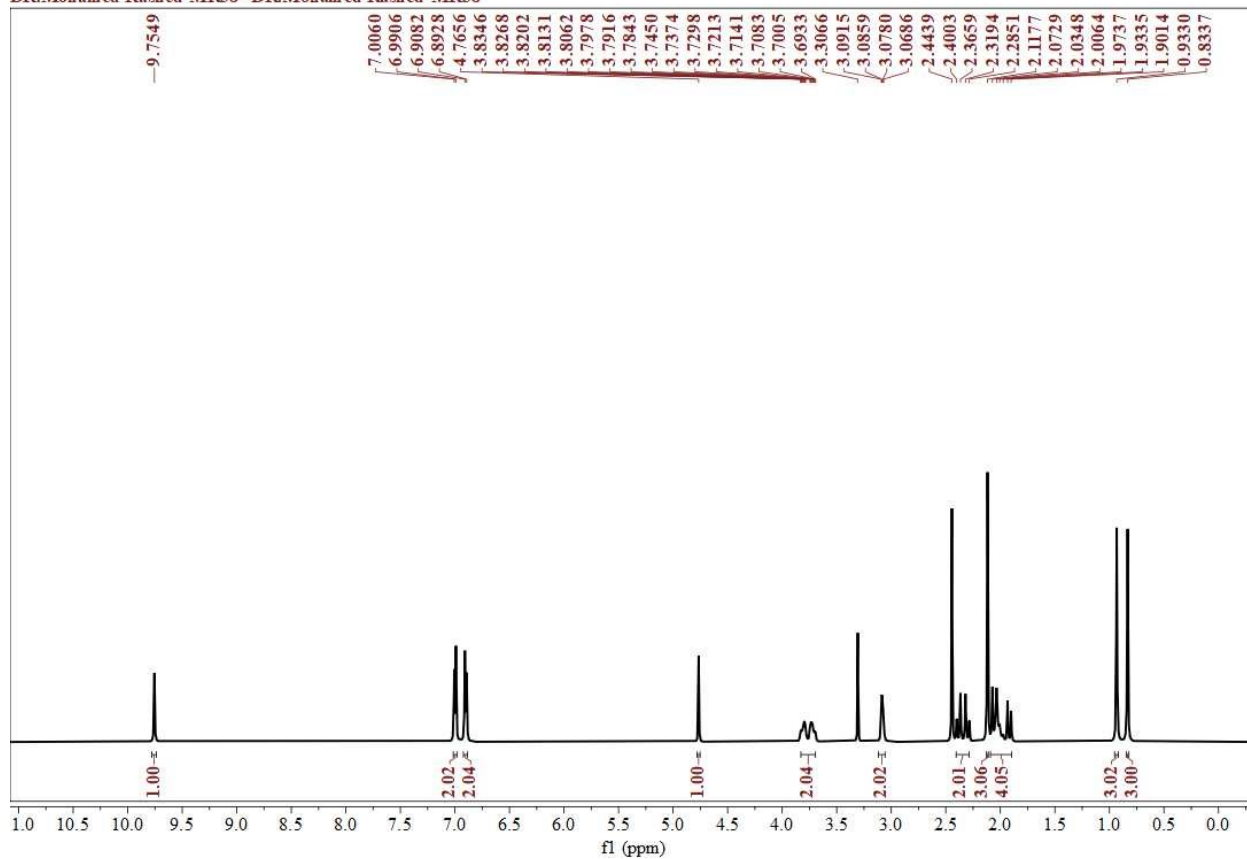

Figure S6. <sup>1</sup>H NMR spectrum of compound 9c

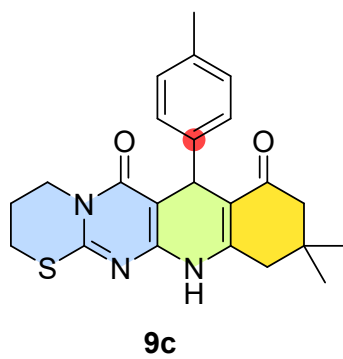

Dr.MohamedRashed-MR-42.C13--Dr.MohamedRashed-MR-42.C13

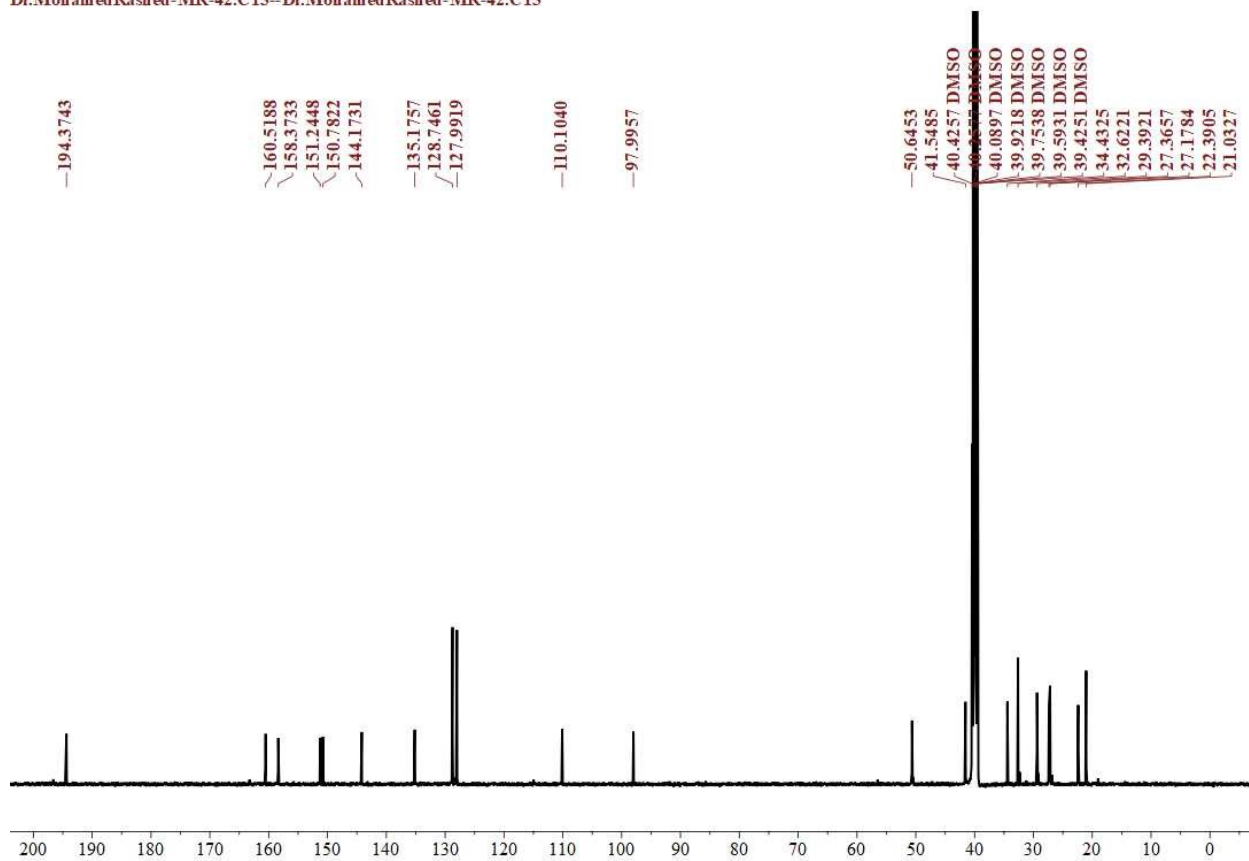

**Figure S7.**  $^{13}\text{C}$  NMR spectrum of compound **9c**

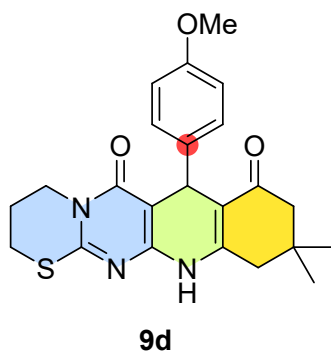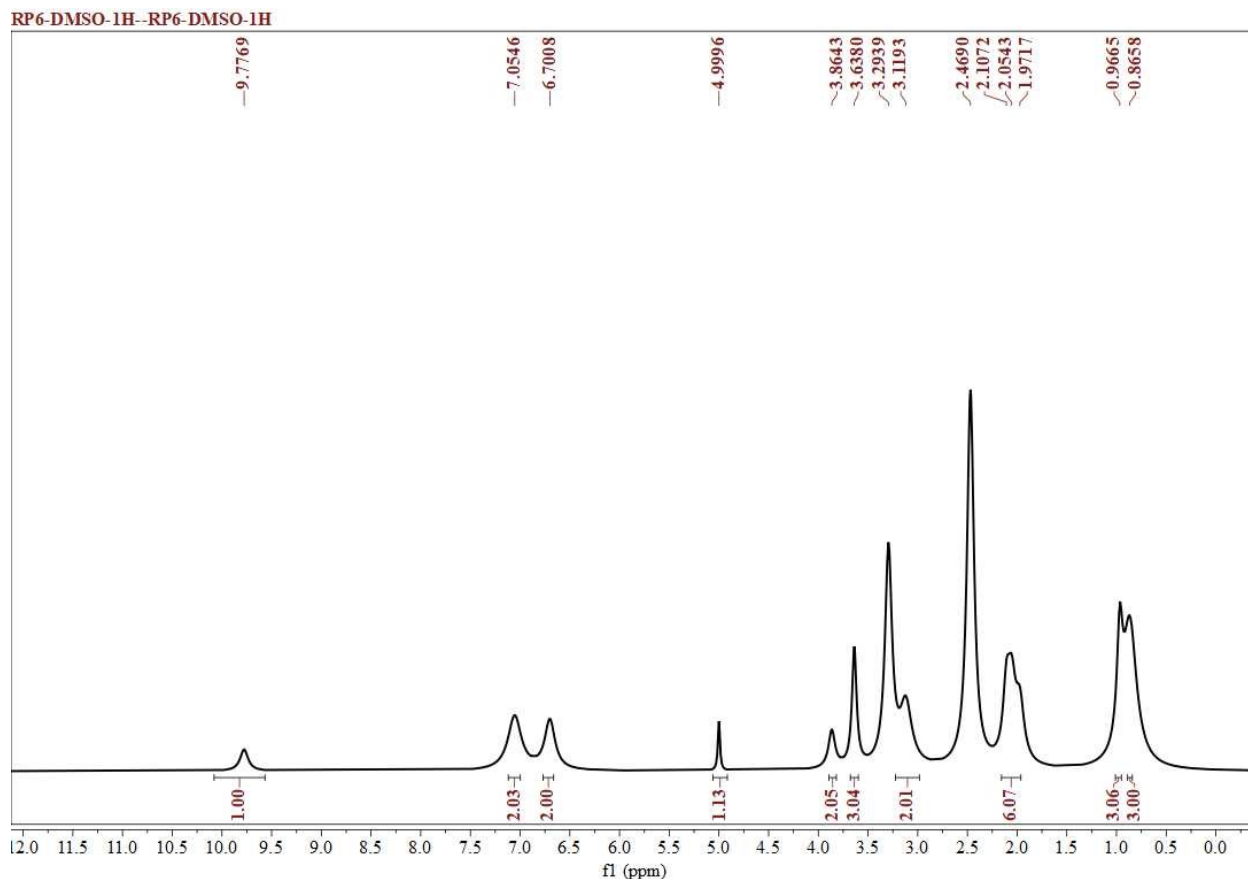

**Figure S8.**  $^1\text{H}$  NMR spectrum of compound **9d**

The broad signals observed in the  $^1\text{H}$  NMR spectrum of compound **9d** are attributed to its limited solubility in the NMR solvent, which can lead to incomplete dissolution and possible aggregation effects, resulting in signal broadening. The compound was re-examined after further purification, and similar spectral features were observed, supporting that the broadening is intrinsic rather than due to impurities.

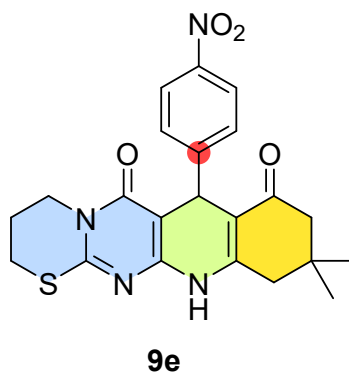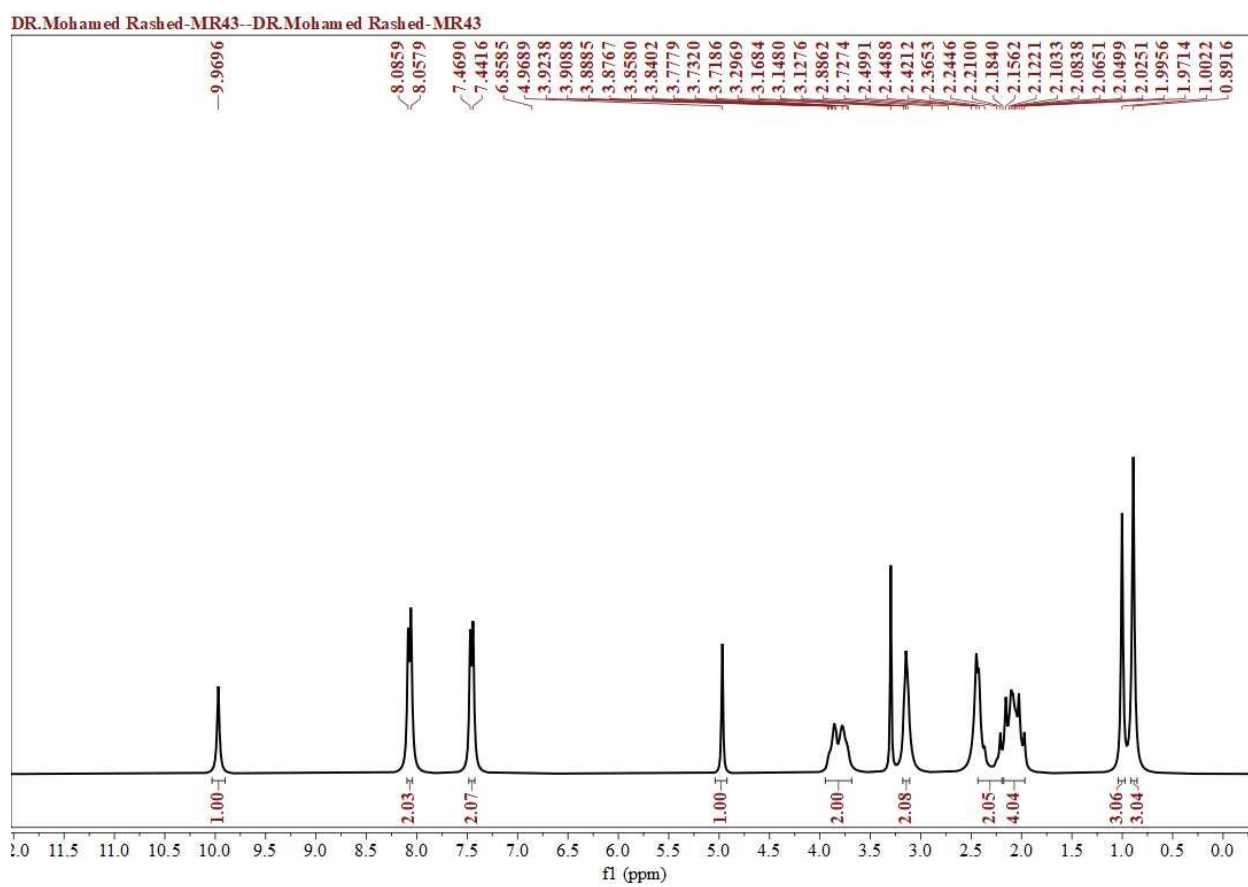

**Figure S10.**  $^1\text{H}$  NMR spectrum of compound **9e**

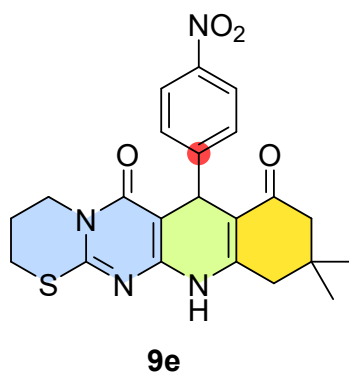

Dr.MohamedRashed-MR-43.C13--Dr.MohamedRashed- MR-43.C13

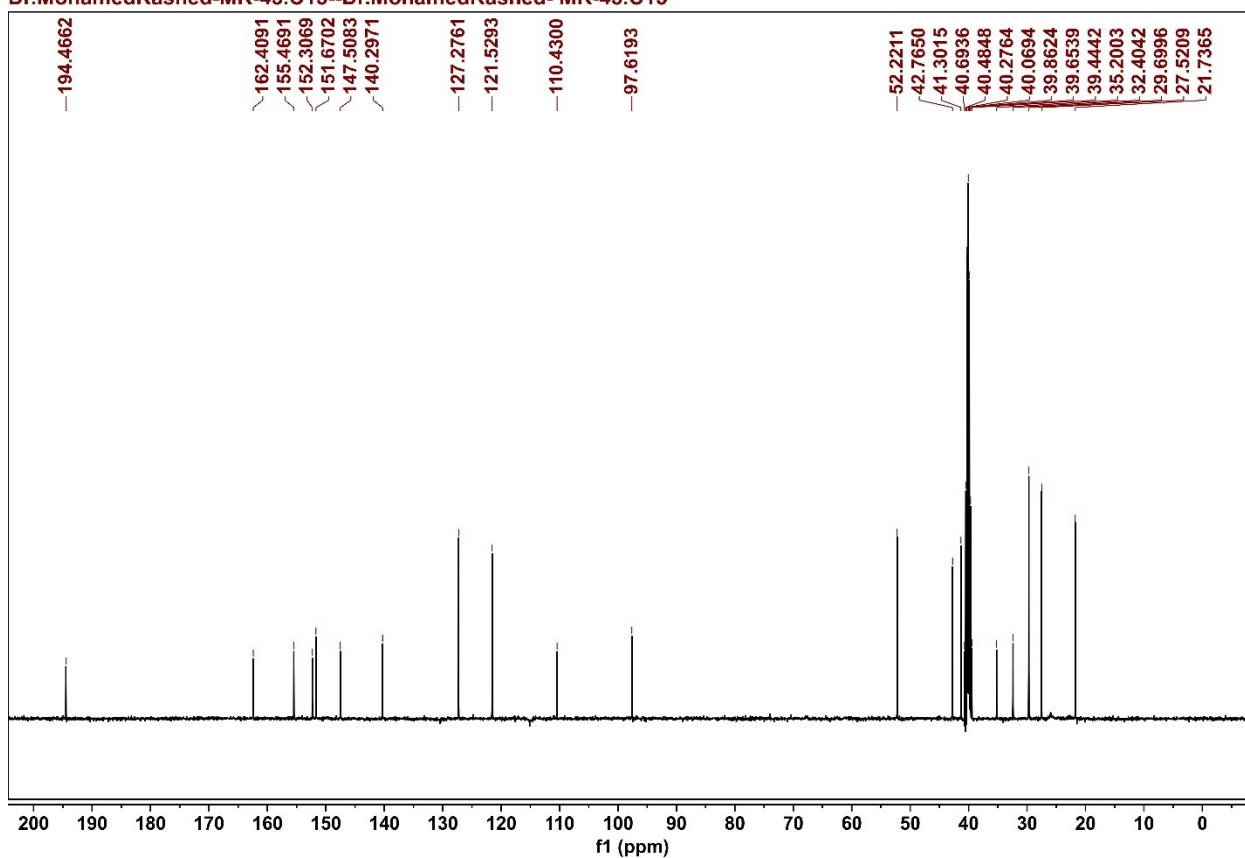

Figure S11. <sup>13</sup>C NMR spectrum of compound 9e

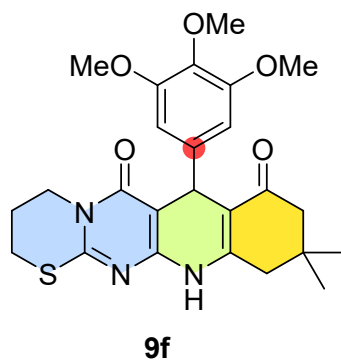

Dr Moh. Rashed-MR-45--Dr Moh. Rashed-MR-45

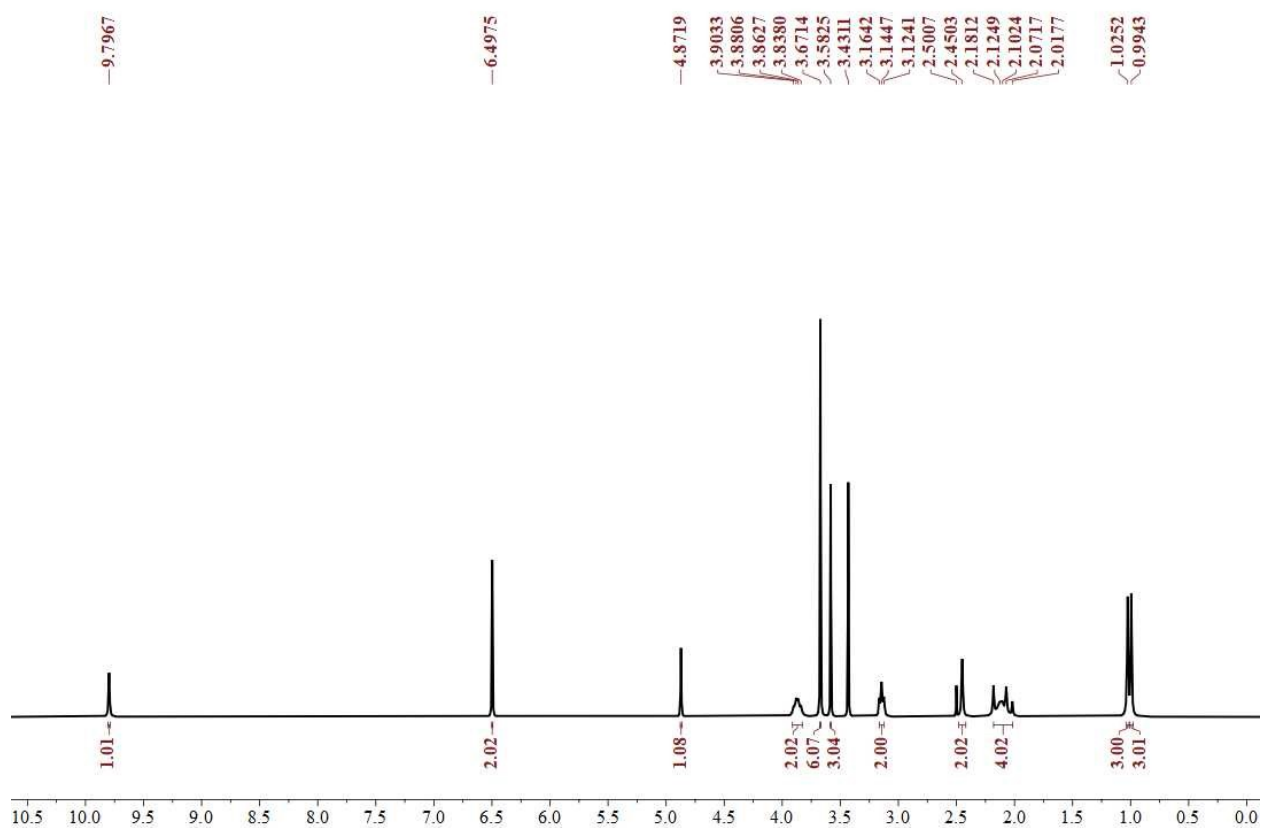

**Figure S12.**  $^1\text{H}$  NMR spectrum of compound **9f**



Dr.MohamedRashed-MR-45.C13--Dr.MohamedRashed- MR-45.C13

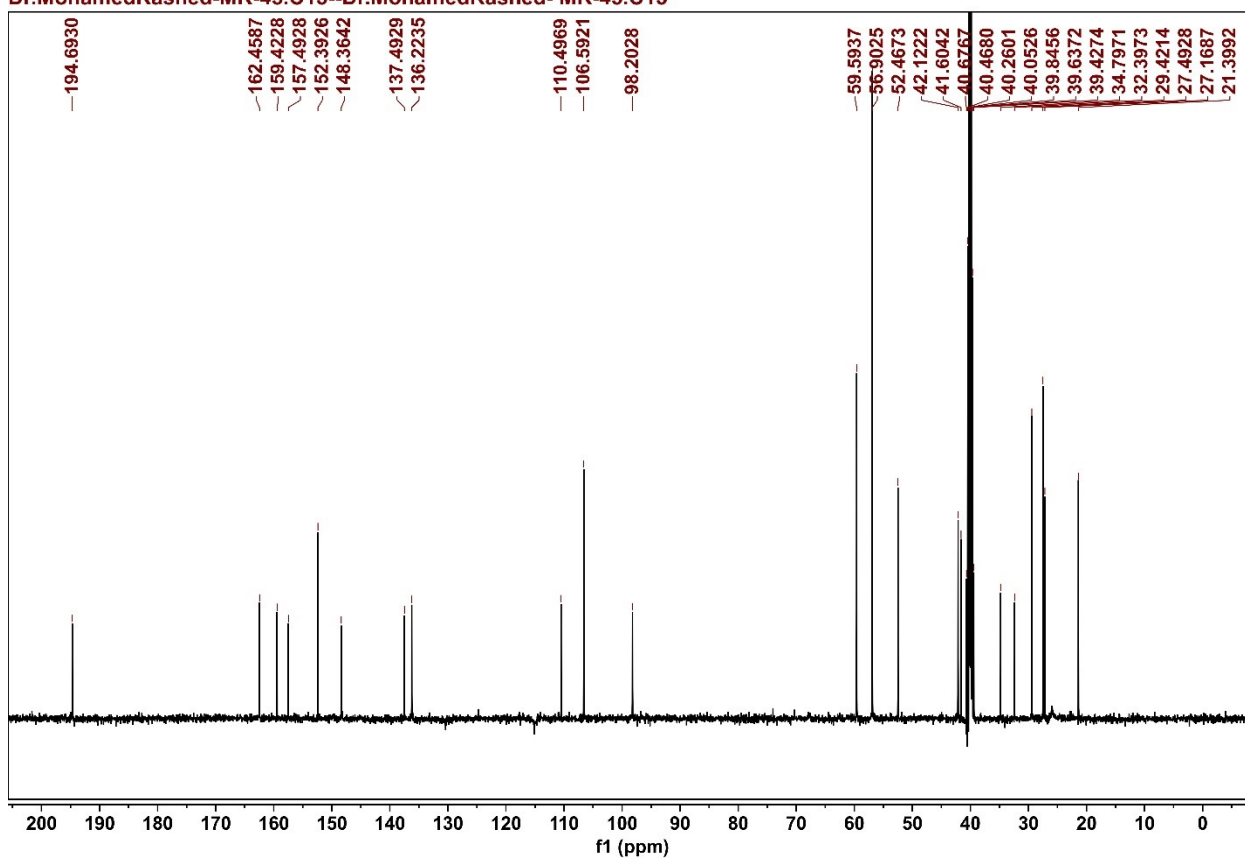

Figure S13. <sup>13</sup>C NMR spectrum of compound **9f**

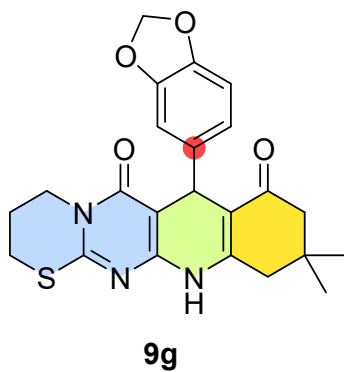

Dr.Mohmed Rashed-MR-47--Dr.Mohmed Rashed-MR-47

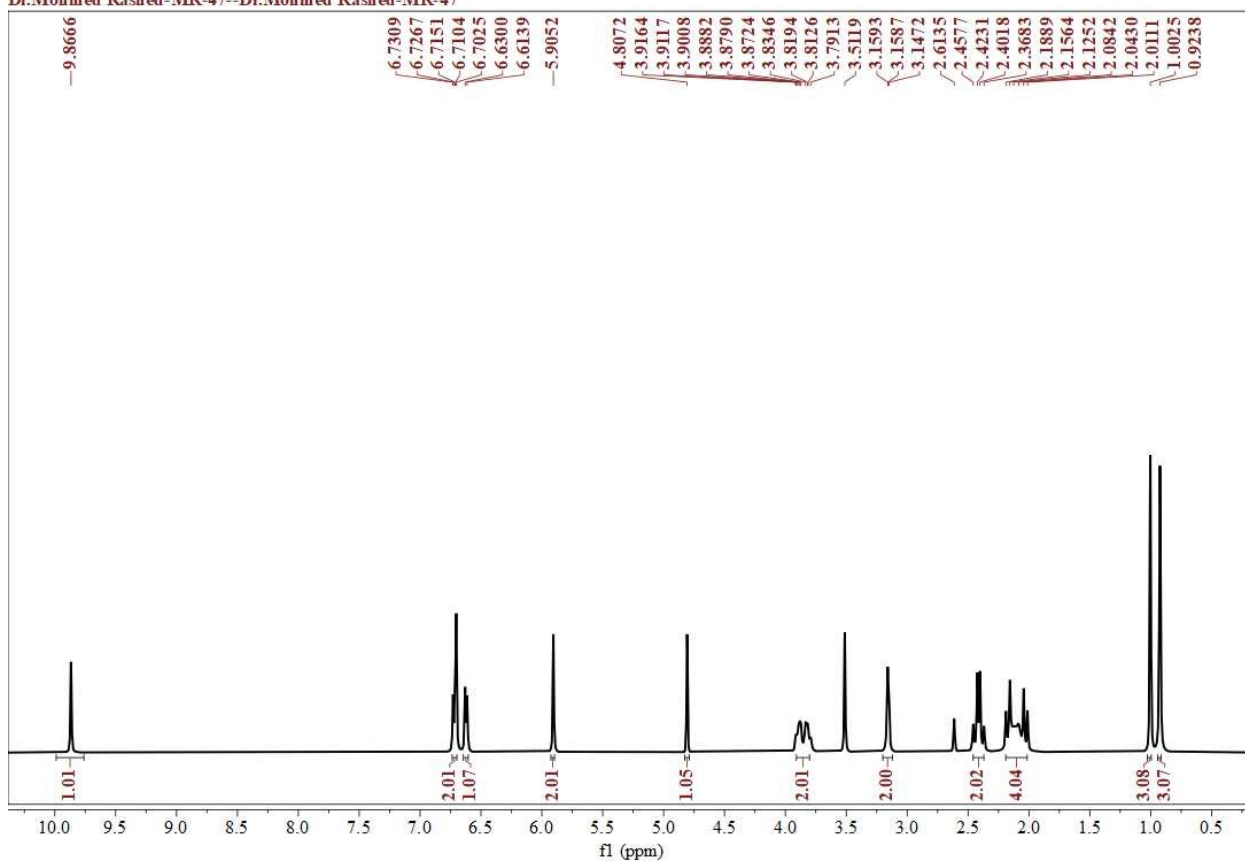

**Figure S14.**  $^1\text{H}$  NMR spectrum of compound **9g**

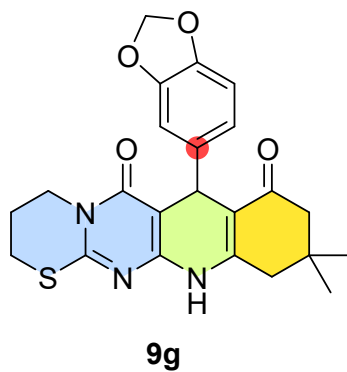

Dr.MohamedRashed-MR-47.C13-Dr.MohamedRashed-MR-47.C13

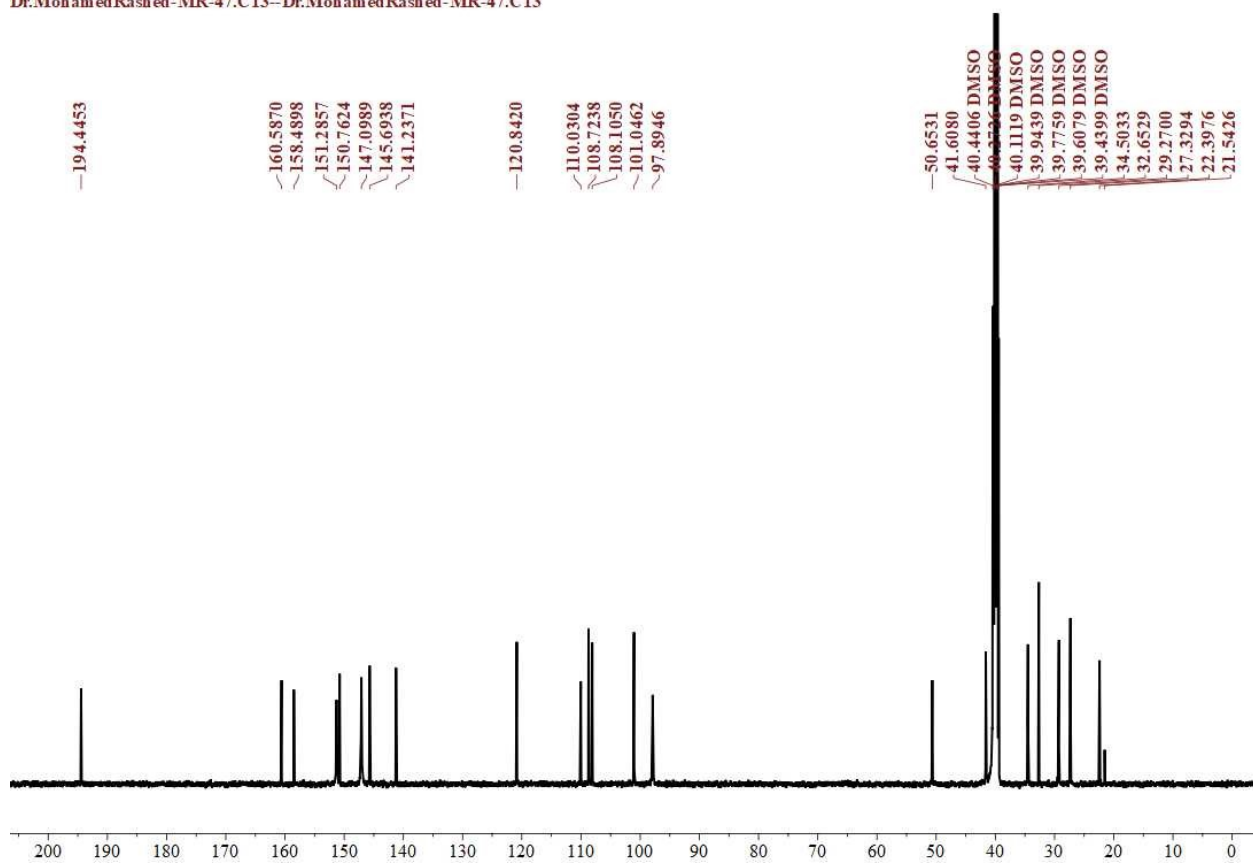

**Figure S15.**  $^{13}\text{C}$  NMR spectrum of compound **9g**
